# Supplementary material
Source: HighWire-hosted journal article supplement (https://bmjopen.bmj.com/content/6/5/e009430)
Supplement: inline-supplementary-material-1 [file inline-supplementary-material-1.pdf]

### Patient Demographics

|              |                                        |                |                                      |
|--------------|----------------------------------------|----------------|--------------------------------------|
| Subject No.: |                                        | Gender:        | Male <input type="checkbox"/>        |
| Age:         |                                        |                | Female <input type="checkbox"/>      |
|              |                                        |                | Transgender <input type="checkbox"/> |
| Employment:  | Unemployed <input type="checkbox"/>    | Home           | Independent <input type="checkbox"/> |
|              | Student <input type="checkbox"/>       | Circumstances: | Supported <input type="checkbox"/>   |
|              | Full-time <input type="checkbox"/>     |                | Homeless <input type="checkbox"/>    |
|              | Self-employed <input type="checkbox"/> |                | Not Noted <input type="checkbox"/>   |
|              | Not noted <input type="checkbox"/>     |                |                                      |

### Psychiatric in-patient stay

|                           |                                   |                                         |                              |
|---------------------------|-----------------------------------|-----------------------------------------|------------------------------|
| Primary Diagnosis:        |                                   |                                         |                              |
| Other Diagnoses:          |                                   |                                         |                              |
| Admission Date:           |                                   | Discharge Date:                         |                              |
| Use of Mental Health Act: | Yes <input type="checkbox"/>      | Previous Psychiatric Admissions (Num.): |                              |
|                           | No <input type="checkbox"/>       |                                         |                              |
| Forensic History:         | Yes <input type="checkbox"/>      | Previous custodial sentence noted:      | Yes <input type="checkbox"/> |
|                           | No <input type="checkbox"/>       |                                         | No <input type="checkbox"/>  |
|                           | No info. <input type="checkbox"/> |                                         |                              |

### Substance use

|                          |                                          |                                 |                                     |
|--------------------------|------------------------------------------|---------------------------------|-------------------------------------|
| NPS mentioned in d/c:    | Yes <input type="checkbox"/>             | Contribute to psych Sx?:        | Yes <input type="checkbox"/>        |
|                          | No <input type="checkbox"/>              |                                 | No <input type="checkbox"/>         |
|                          |                                          |                                 | Not stated <input type="checkbox"/> |
| Name(s) of NPS:          |                                          |                                 |                                     |
| Route of administration: | IV <input type="checkbox"/>              | Smoked <input type="checkbox"/> |                                     |
|                          | Insufflation <input type="checkbox"/>    | Other <input type="checkbox"/>  |                                     |
|                          | Oral <input type="checkbox"/>            | .....                           |                                     |
| Other substance misuse:  | Alcohol <input type="checkbox"/>         |                                 |                                     |
|                          | Cannabis <input type="checkbox"/>        |                                 |                                     |
|                          | Benzodiazepines <input type="checkbox"/> |                                 |                                     |
|                          | Cocaine <input type="checkbox"/>         |                                 |                                     |
|                          | MDMA <input type="checkbox"/>            |                                 |                                     |
|                          | Amphetamines <input type="checkbox"/>    |                                 |                                     |
|                          | GBL / GHB <input type="checkbox"/>       |                                 |                                     |
|                          | Opiates <input type="checkbox"/>         | (on substitute)                 |                                     |
|                          | Which substitute? .....                  |                                 |                                     |
|                          | Opiates <input type="checkbox"/>         | (not on substitute)             |                                     |
|                          | Other: <input type="checkbox"/>          |                                 |                                     |
|                          | What? .....                              |                                 |                                     |
